# Supplementary material for: Weak rTMS-induced electric fields produce neural entrainment in humans
Source: Sci Rep. 2020 Jul 20;10:11994. doi: 10.1038/s41598-020-68687-8 (PMC7371859; doi:10.1038/s41598-020-68687-8)
Supplement: Supplementary file 1 — Supplementary information. [file 41598_2020_68687_MOESM1_ESM.pdf]

# Weak rTMS-induced electric fields produce neural entrainment in humans

Elina Zmeykina<sup>1</sup>, Matthias Mittner<sup>2</sup>, Walter Paulus<sup>1</sup> and Zsolt Turi<sup>\*1</sup>

<sup>1</sup>Department of Clinical Neurophysiology, University Medical Center Goettingen,  
Göttingen, Germany

<sup>2</sup>Department of Psychology, University of Tromsø, Norway

<sup>3</sup>Department of Neuroanatomy, Institute of Anatomy and Cell Biology, University of  
Freiburg, Germany

\*Correspondence: [zsolt.turi@med.uni-goettingen.de](mailto:zsolt.turi@med.uni-goettingen.de)

## **Supplemental Method**

### **Validation measurement**

Since rTMS devices typically operate at high stimulation intensities ( $\geq 30\%$  MSO) we first validated the output stability of our MagPro X100 stimulator with the MC-B70 coil in the lower stimulation intensity regimen. For that purpose, we measured the induced EF waveforms and peak voltage values with an external induction coil, which was connected to a digital storage oscilloscope (Rigol DS1052E). The tests were performed at intensities from five to 20 percent of MSO with 1% increments and at 30% of MSO. We applied 20 TMS pulses at each pre-determined stimulation intensity. The stimulator produced detectable and stable TMS pulses starting at 8% of MSO. This prospective validation measurement determined the practical lower limit for the rTMS dose, and we ensured that all participants received a stimulation intensity of  $\geq 8\%$  MSO. This value corresponds to the induced peak value of an absolute EF strength of ca.  $20 \text{ mV/mm}$ . Note that TMS pulses weaker than 8% MSO probably produced electromagnetic-fields but our external induction coil was unable to detect them.

## Supplemental Results

| Index | PMID     | Article                        | Method | Threshold percent | MSO       |
|-------|----------|--------------------------------|--------|-------------------|-----------|
| 1     | 28343866 | Albouy et al. <sup>1</sup>     | FXD    | i/r               | 60        |
| 2     | 29247630 | Ando et al. <sup>2</sup>       | RMT    | 90                | n/r       |
| 3     | 27812319 | Bai et al. <sup>3</sup>        | RMT    | 90                | n/r       |
| 4     | 28928648 | Bharath et al. <sup>4</sup>    | RMT    | 90                | n/r       |
| 5     | 29241839 | Cao et al. <sup>5</sup>        | RMT    | 100               | 44.5      |
| 6     | 27600845 | Capotosto et al. <sup>6</sup>  | RMT    | 100               | n/r       |
| 7     | 30099627 | Cha et al. <sup>7</sup>        | RMT    | 110               | n/r       |
| 8     | 29060275 | Chen et al. <sup>8</sup>       | RMT    | 110               | n/r       |
| 9     | 27445730 | D'Agata et al. <sup>9</sup>    | RMT    | 80                | n/r       |
| 10    | 27215619 | Daltrozzo et al. <sup>10</sup> | RMT    | 90                | n/r       |
| 11    | 26679060 | DelFelice et al. <sup>11</sup> | RMT    | 100               | 58.6/61.9 |
| 12    | 30253222 | DiGiacomo et al. <sup>12</sup> | RMT    | 80                | 47.4      |
| 13    | 27626224 | Emrich et al. <sup>13</sup>    | RMT    | 110               | 72        |
| 14    | 29984172 | Fisher et al. <sup>14</sup>    | RMT    | 90                | n/r       |
| 15    | 26608023 | Gongora et al. <sup>15</sup>   | RMT    | 80                | 47.4      |
| 16    | 29770146 | He et al. <sup>16</sup>        | RMT    | 100               | n/r       |
| 17    | 29224411 | Hunter et al. <sup>17</sup>    | RMT    | 80-120            | n/r       |
| 18    | 29238296 | Jin et al. <sup>18</sup>       | RMT    | 90                | n/r       |
| 19    | 26778629 | Kamp et al. <sup>19</sup>      | RMT    | 110               | n/r       |
| 20    | 28413707 | Karton et al. <sup>20</sup>    | vMT    | 80                | n/r       |
| 21    | 27138833 | Kazemi et al. <sup>21</sup>    | RMT    | 100/120           | n/r       |
| 22    | 30233346 | Kazemi et al. <sup>22</sup>    | RMT    | 100/120           | n/r       |
| 23    | 30386222 | Keuper et al. <sup>23</sup>    | FXD    | i/r               | 50        |
| 24    | 27909453 | Kim et al. <sup>24</sup>       | vMT    | 110               | n/r       |
| 25    | 27852164 | Kito et al. <sup>25</sup>      | MT     | 120               | n/r       |
| 26    | 29277405 | Koch et al. <sup>26</sup>      | RMT    | 110               | 60.8      |
| 27    | 25165064 | Li et al. <sup>27</sup>        | MT     | 100               | n/r       |
| 28    | 28959194 | Li et al. <sup>28</sup>        | RMT    | 110               | n/r       |
| 29    | 28614399 | Li et al. <sup>29</sup>        | RMT    | 110               | n/r       |
| 30    | 29742385 | Lowe et al. <sup>30</sup>      | RMT    | 80                | 52/53     |
| 31    | 28689295 | Lozeron et al. <sup>31</sup>   | RMT    | 80                | n/r       |
| 32    | 28008080 | Moebius et al. <sup>32</sup>   | RMT    | 110               | n/r       |
| 33    | 30219485 | Nathou et al. <sup>33</sup>    | RMT    | 80                | n/r       |
| 34    | 27516735 | Nicolo et al. <sup>34</sup>    | vMT    | 90                | n/r       |

|    |          |                               |     |     |      |
|----|----------|-------------------------------|-----|-----|------|
| 35 | 28160748 | Noda et al. <sup>25</sup>     | RMT | 95  | 82.2 |
| 36 | 30318052 | Noda et al. <sup>35</sup>     | RMT | 95  | 78   |
| 37 | 26873935 | Oshima <sup>36</sup>          | RMT | 90  | n/r  |
| 38 | 30290037 | Prashad et al. <sup>37</sup>  | vMT | 80  | n/r  |
| 39 | 29914282 | Rocha et al. <sup>38</sup>    | RMT | 80  | 46.2 |
| 40 | 26584867 | Romei <sup>39</sup>           | AMT | 90  | 41.9 |
| 41 | 27687560 | Rousseau <sup>40</sup>        | RMT | 120 | n/r  |
| 42 | 30425640 | Shalbaf et al. <sup>41</sup>  | vMT | 120 | n/r  |
| 43 | 29249371 | Shields et al. <sup>42</sup>  | vMT | 90  | n/r  |
| 44 | 28539601 | Spadone et al. <sup>43</sup>  | RMT | 100 | n/r  |
| 45 | 27428476 | Tikka et al. <sup>44</sup>    | RMT | 80  | n/r  |
| 46 | 30295684 | Valiulis et al. <sup>45</sup> | MT  | 100 | n/r  |
| 47 | 28902713 | Xia et al. <sup>46</sup>      | RMT | 90  | n/r  |

**Table S1. The vast majority of rTMS studies determine stimulation intensity with the so-called near threshold approach.**

We performed a systematic search on PubMed of literature published between 2016 and 2018 with the searching terms “rTMS AND EEG” and “rhythmic TMS AND EEG”. Of the 134 hits, we found 47 eligible articles. All published studies had determined the stimulation frequency with the fixed intensity or the motor threshold approach. The articles are ordered alphabetically. Abbreviations: FXD: fixed intensity; i/r: irrelevant; MSO: maximum stimulator output expressed in percentages; MT: motor threshold; n/r: information is not reported; PMID: PubMed identification number; RMT: resting motor threshold; vMT: visually identified motor threshold.

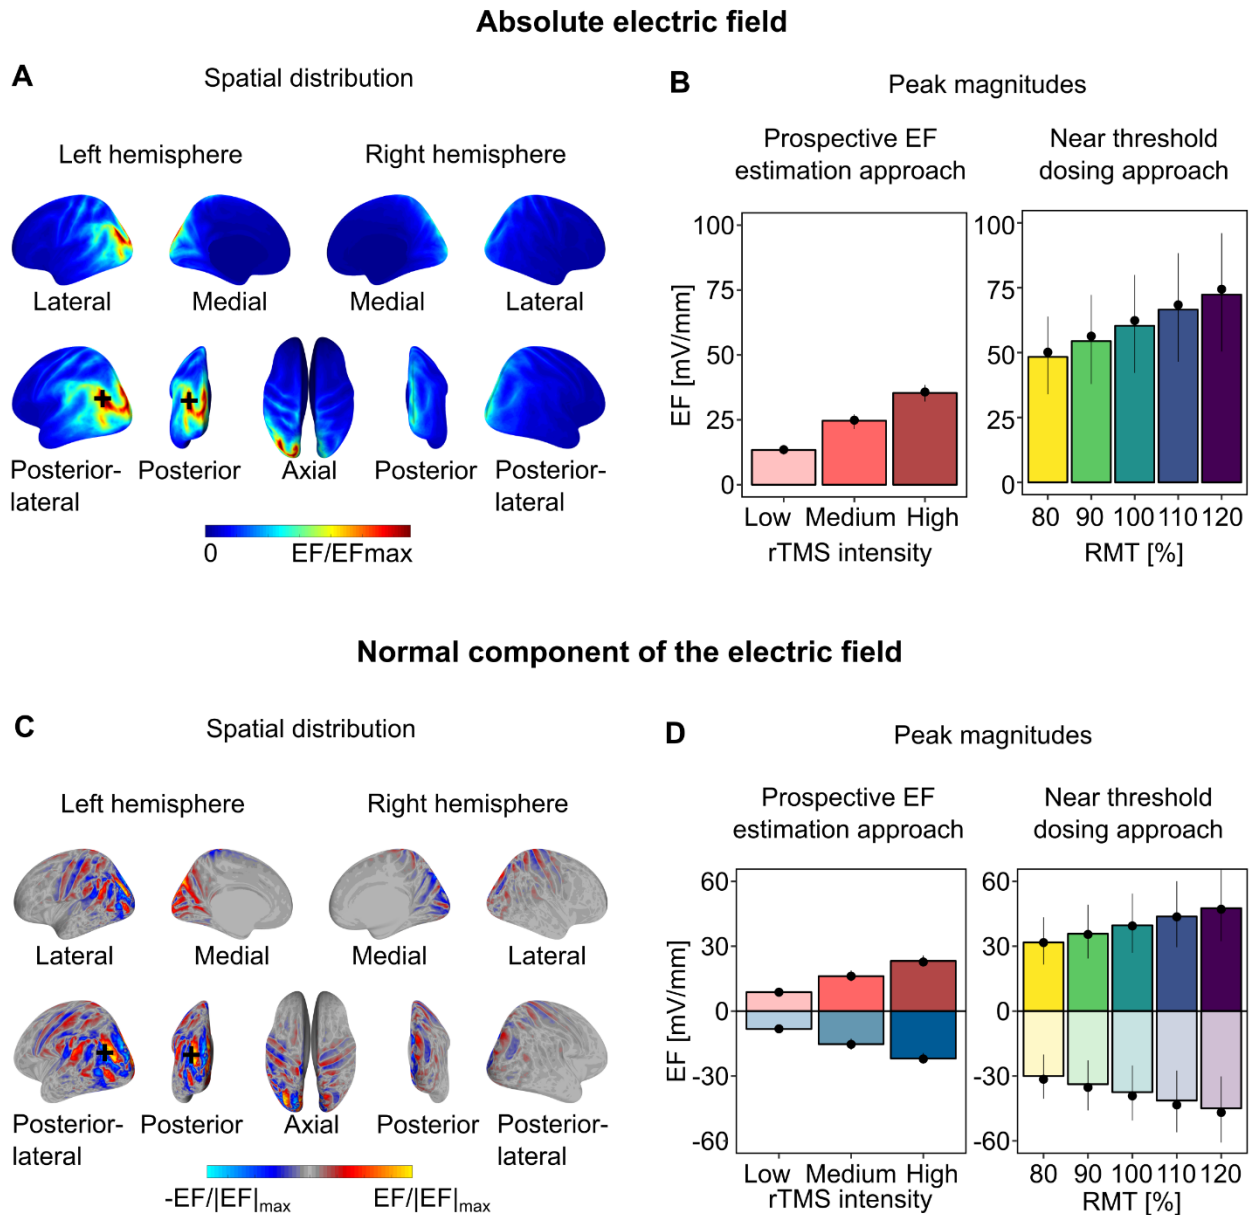

**Figure S1. Group-level (n=16) spatial distribution of electric field values.**

(A) Absolute electric field values were extracted from the gray matter and projected onto the inflated Freesurfer average template brain. (B) Group-level peak magnitudes of the absolute electric field values in the two intensity selection approaches. (C) Group-level normal component of the electric field values was extracted from the gray matter and

projected onto the inflated Freesurfer average template brain. (D) Peak magnitudes of the normal component of the electric field in the two intensity selection approaches. Peak magnitudes correspond to the 99.9th percentile. A black plus sign shows the positioning of the TMS coil over the PO3 electrode. Bar plots show the mean and dot plots show the median values. Range plots correspond to the 2.5th and the 97.5th percentiles, respectively. Abbreviations: EF – electric field; RMT – resting motor threshold.

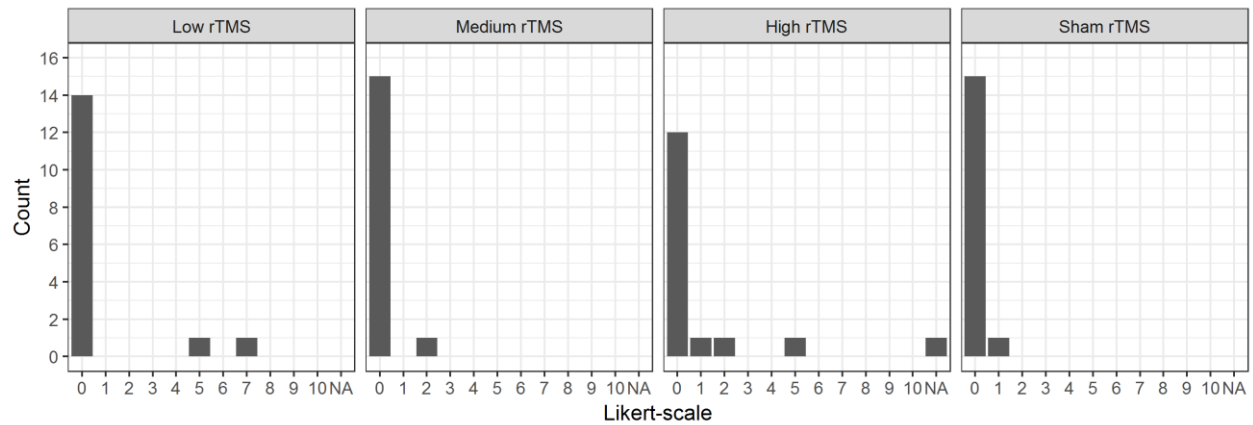

**Figure S2. Participants reported a minimal amount of somatosensory perceptual adverse effects.**

Both in the main (low, medium and high rTMS) and control experiment (sham rTMS), the participants filled out a post-experimental questionnaire about the somatosensory perceptual adverse effects. Likert scale ranges from 0 and 10, where 0 refers to no sensation detected, 1 indicates minimally detectable sensation and 10 refers to unbearably uncomfortable sensation. NA refers to the case when no answer was provided by the participant.

## Supplemental References

1. Albouy, P., Weiss, A., Baillet, S. & Zatorre, R. J. Selective Entrainment of Theta Oscillations in the Dorsal Stream Causally Enhances Auditory Working Memory Performance. *Neuron* **94**, 193-206.e5 (2017).
2. Ando, A. *et al.* Effects of repetitive transcranial magnetic stimulation ( rTMS ) on attribution of movement to ambiguous stimuli and EEG mu suppression. *Brain Res.* **1680**, 69–76 (2018).
3. Bai, Y. *et al.* Evaluating the Effect of Repetitive Transcranial Magnetic Stimulation on Disorders of Consciousness by Using. *Front. Neurosci.* **10**, 437 (2016).
4. Bharath, R. D. *et al.* A Single Session of rTMS Enhances Small-Worldness in Writer ' s Cramp : Evidence from Simultaneous. *Front. Hum. Neurosci.* **11**, 443 (2017).
5. Cao, D., Li, Y., Niznikiewicz, M. A. & Tang, Y. The theta burst transcranial magnetic stimulation over the right PFC affects electroencephalogram oscillation during emotional processing. *Prog. Neuropsychopharmacol. Biol. Psychiatry* **82**, 21–30 (2018).
6. Capotosto, P. *et al.* Task and Regions Specific Top-Down Modulation of Alpha Rhythms in Parietal Cortex. *Cereb. Cortex* **27**, 4815–4822 (2017).
7. Cha, Y. H. *et al.* Electrophysiological Signatures of Intrinsic Functional Connectivity Related to rTMS Treatment for Mal de Debarquement Syndrome. *Brain Topogr.* **31**, 1047–1058 (2018).
8. Chen, Y. *et al.* Assessing rTMS Effects in MdDS : Cross - modal Comparison between Resting State EEG and fMRI Connectivity. *Conf. Proc. 39th Annu. Int. Conf. IEEE Eng. Med. Biol. Soc.* 1950–1953 (2017)

doi:10.1109/EMBC.2017.8037231.

9. D'Agata, F. *et al.* Cognitive and Neurophysiological Effects of Non-invasive Brain Stimulation in Stroke Patients after Motor Rehabilitation. *Front. Behav. Neurosci.* **10**, 135 (2016).
10. Daltrozzo, J., Kotchoubey, B., Gueler, F. & Karim, A. A. Effects of Transcranial Magnetic Stimulation on Body Perception : No Evidence for Specificity of the Right Temporo-Parietal Junction. *Brain Topogr.* **29**, 704–715 (2016).
11. Del Felice, A. *et al.* Neurophysiological , psychological and behavioural correlates of rTMS treatment in alcohol dependence. *Drug Alcohol Depend.* **158**, 147–153 (2016).
12. Di Giacomo, J. *et al.* Neuroscience Letters Repetitive Transcranial Magnetic Stimulation changes absolute theta power during cognitive / motor tasks. *Neurosci. Lett.* **687**, 77–81 (2018).
13. Emrich, S. M., Johnson, J. S., Sutterer, D. W. & Postle, B. R. Comparing the Effects of 10-Hz Repetitive TMS on Tasks of Visual STM and Attention. *J. Cogn. Neurosci.* **29**, 286–97 (2017).
14. Fisher, R. *et al.* Epilepsy & Behavior Case Reports Repetitive transcranial magnetic stimulation directed to a seizure focus localized by high-density EEG : A case report. *Epilepsy Behav. Case Reports* **10**, 47–53 (2018).
15. Gongora, M. *et al.* Low-frequency rTMS over the Parieto – frontal network during a sensorimotor task : The role of absolute beta power in the sensorimotor integration. *Neurosci. Lett.* **611**, 1–5 (2016).
16. He, F. *et al.* Clinical Study Effects of 20Hz Repetitive Transcranial Magnetic Stimulation on Disorders of Consciousness : A Resting-State

Electroencephalography Study. *Neural Plast.* 5036184 (2018).

17. Hunter, A. M. *et al.* Change in Quantitative EEG Theta Cordance as a Potential Predictor of Repetitive Transcranial Magnetic Stimulation Clinical Outcome in Major Depressive Disorder. *Clin. EEG Neurosci. EEG Neurosci* **49**, 306–315 (2018).
18. Jin, J.-N. *et al.* The Effects of rTMS Combined with Motor Training on Functional Connectivity in Alpha Frequency Band. *Front. Behav. Neurosci.* **11**, 234 (2017).
19. Kamp, D. *et al.* High frequency repetitive transcranial magnetic stimulation ( rTMS ) reduces EEG-hypofrontality in patients with schizophrenia. *Psychiatry Res.* **236**, 199–201 (2016).
20. Karton, I. & Bachmann, T. Disrupting dorsolateral prefrontal cortex by rTMS reduces the P300 based marker of deception. *Brain Behav.* **7**, e00656 (2017).
21. Kazemi, R. *et al.* Electrophysiological correlates of bilateral and unilateral repetitive transcranial magnetic stimulation in patients with bipolar depression. *Psychiatry Res.* **240**, 364–375 (2016).
22. Kazemi, R. *et al.* Bilateral Transcranial Magnetic Stimulation on DLPFC Changes Resting State Networks and Cognitive Function in Patients With Bipolar Depression. *Front. Hum. Neurosci.* **12**, 365 (2018).
23. Keuper, K., Terrighena, E. L., Chan, C. C. H. & Junghoefer, M. How the Dorsolateral Prefrontal Cortex Controls Affective Processing in Absence of Visual Awareness – Insights From a Combined EEG-rTMS Study. *Front. Hum. Neurosci.* **12**, 1–19 (2018).
24. Kim, Y. I., Kim, S. M., Kim, H. & Han, D. H. The Effect of High-Frequency Repetitive Transcranial Magnetic Stimulation on Occupational Stress among

Health Care Workers : A Pilot Study. *Psychiatry Investig.* **13**, 622–629 (2016).

25. Kito, S. *et al.* Transcranial Magnetic Stimulation Modulates Resting EEG Functional Connectivity Between the Left Dorsolateral Prefrontal Cortex and Limbic Regions in Medicated Patients With Treatment-Resistant Depression. *Journal Neuropsychiatry Clin. Neurosci.* **29**, 155–159 (2017).
26. Koch, G. *et al.* Transcranial magnetic stimulation of the precuneus enhances memory and neural activity in prodromal Alzheimer ' s disease. *Neuroimage* **169**, 302–311 (2018).
27. Li, C.-T. *et al.* Cognition-Modulated Frontal Activity in Prediction and Augmentation of Antidepressant Efficacy : A Randomized Controlled Pilot Study. *Cereb. Cortex* **26**, 202–210 (2016).
28. Li, S. *et al.* Theta and Alpha Oscillations during the Retention Period of Working Memory by rTMS Stimulating the Parietal Lobe. *Front. Behav. Neurosci.* **11**, 170 (2017).
29. Li, Y. *et al.* The effects of high-frequency rTMS over the left DLPFC on cognitive control in young healthy participants. *PLoS One* **12**, e0179430 (2017).
30. Lowe, C. J., Staines, W. R., Manocchio, F. & Hall, P. A. The neurocognitive mechanisms underlying food cravings and snack food consumption . A combined continuous theta burst stimulation ( cTBS ) and EEG study. *Neuroimage* **177**, 45–58 (2018).
31. Lozeron, P. *et al.* Inhibitory rTMS applied on somatosensory cortex in Wilson ' s disease patients with hand dystonia. *J. Neural Transm.* **124**, 1161–1170 (2017).
32. Möbius, M. *et al.* Repetitive transcranial magnetic stimulation modulates the impact of a negative mood induction. *Soc. Cogn. Affect. Neurosci.* **12**, 526–533

(2017).

33. Nathou, C. *et al.* Effects of low- and high-frequency repetitive transcranial magnetic stimulation on long-latency auditory evoked potentials. *Neurosci. Lett.* **686**, 198–204 (2018).
34. Nicolo, P., Fargier, R., Laganaro, M. & Guggisberg, A. G. Neurobiological Correlates of Inhibition of the Right Broca Homolog during New-Word Learning. *Front. Hum. Neurosci.* **10**, 371 (2016).
35. Noda, Y., Zomorodi, R., Daskalakis, J., Blumberger, D. M. & Nakamura, M. Enhanced theta-gamma coupling associated with hippocampal volume increase following high-frequency left prefrontal repetitive transcranial magnetic stimulation in patients with major depression. *Int. J. Psychophysiol.* **133**, 169–174 (2018).
36. Oshima, H. *et al.* Alteration of Duration Mismatch Negativity Induced by Transcranial Magnetic Stimulation Over the Left Parietal Lobe. *Clin. EEG Neurosci.* **48**, 11–19 (2017).
37. Prashad, S., Dedrick, E. S., To, W. T., Vanneste, S. & Filbey, F. M. Testing the role of the posterior cingulate cortex in processing salient stimuli in cannabis users : an rTMS study. *Eur. J. Neurosci.* 1–13 (2018) doi:10.1111/ejn.14194.
38. Rocha, K. *et al.* Low-frequency rTMS stimulation over superior parietal cortex medially improves time reproduction and increases the right dorsolateral prefrontal cortex predominance. *Int. J. Neurosci.* **129**, 523–533 (2018).
39. Romei, V. *et al.* Causal evidence that intrinsic beta-frequency is relevant for enhanced signal propagation in the motor system as shown through rhythmic TMS. *Neuroimage* **126**, 120–130 (2016).
40. Rousseau, E., Melo-silva, C. A., Gakwaya, S. & Sériès, F. Effects of repetitive

transcranial magnetic stimulation of upper airway muscles during sleep in obstructive sleep apnea patients. *J. Appl. Physiol.* **121**, 1217–1225 (2016).

41. Shalbaf, R. *et al.* Non-linear Entropy Analysis in EEG to Predict Treatment Response to Repetitive Transcranial Magnetic Stimulation in Depression. *Front. Pharmacol.* **9**, 1188 (2018).
42. Shields, J., Devier, D. & Foundas, A. Journal of the Neurological Sciences Unilateral repetitive transcranial magnetic stimulation differentially affects younger and older adults completing a verbal working memory task. *J. Neurol. Sci.* **384**, 15–20 (2018).
43. Spadone, S., Sestieri, C., Baldassarre, A. & Capotosto, P. Temporal dynamics of TMS interference over preparatory alpha activity during semantic decisions. *Scient* **7**, 2372 (2017).
44. Tikka, S. K. *et al.* Safety and Efficacy of Adjunctive  $\Theta$  Burst Repetitive Transcranial Magnetic Stimulation to Right Inferior Parietal Lobule in Schizophrenia Patients With A Pilot , Exploratory Study. *J. ECT* **33**, 43–51 (2017).
45. Valiulis, V., Gerulskis, G., Dapšys, K. & Valavičiūtė, K. The use of MR - less MNI based neuronavigation for 10 Hz rTMS depression therapy : electrophysiological and clinical implications. *Acta Neurobiol. Exp. (Wars)*. **78**, 271–280 (2018).
46. Xia, X. *et al.* Long-lasting repetitive transcranial magnetic stimulation modulates electroencephalography oscillation in patients with disorders of consciousness. *Neuroreport* **28**, 1022–1029 (2017).
